# Supplementary material
Source: publisher figshare collection journal article supplement (https://acs.figshare.com/ndownloader/files/15347891)
Supplement: Supplementary file 1 [file 15347891]

# Supporting Information

## One-pot and One-step Fabrication of Salt Responsive Bilayer Hydrogels with 2D and 3D Shape Transformations

Xiaomin He<sup>†</sup>, Dong Zhang<sup>¶</sup>, Jiahui Wu<sup>‡</sup>, Yang Wang<sup>‡</sup>, Feng Chen<sup>‡</sup>, Ping Fan<sup>‡</sup>, Mingqiang Zhong<sup>‡</sup>,  
Shengwei Xiao<sup>\*‡</sup>, Jintao Yang<sup>\*†</sup>

<sup>†</sup> College of Materials Science & Engineering  
Zhejiang University of Technology, Hangzhou 310014, China

<sup>‡</sup> School of Pharmaceutical and Chemical Engineering  
Taizhou University, Jiaojiang 318000, China

<sup>¶</sup> Department of Chemical and Biomolecular Engineering  
The University of Akron, Akron, Ohio 44325, USA

**\*Corresponding Author:** (J. Y.) [yangjt@zjut.edu.cn](mailto:yangjt@zjut.edu.cn); (S.X.) [xiaoshengwei@hotmail.com](mailto:xiaoshengwei@hotmail.com)

**Keywords:** one-step, one-pot, zwitterionic polymer, bilayer hydrogel, 3D shape transformation.

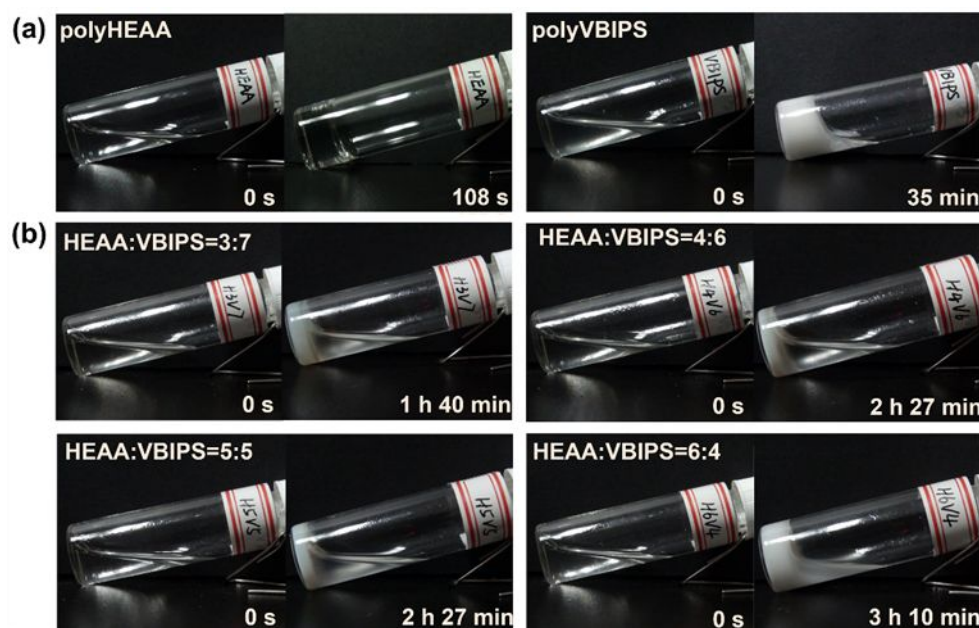

Figure S1. (a) Gel formation of the pristine polyHEAA and polyVBIPS hydrogels and (b) first layer gel formation of polyHEAA/polyVBIPS bilayer hydrogels with different monomer ratios.

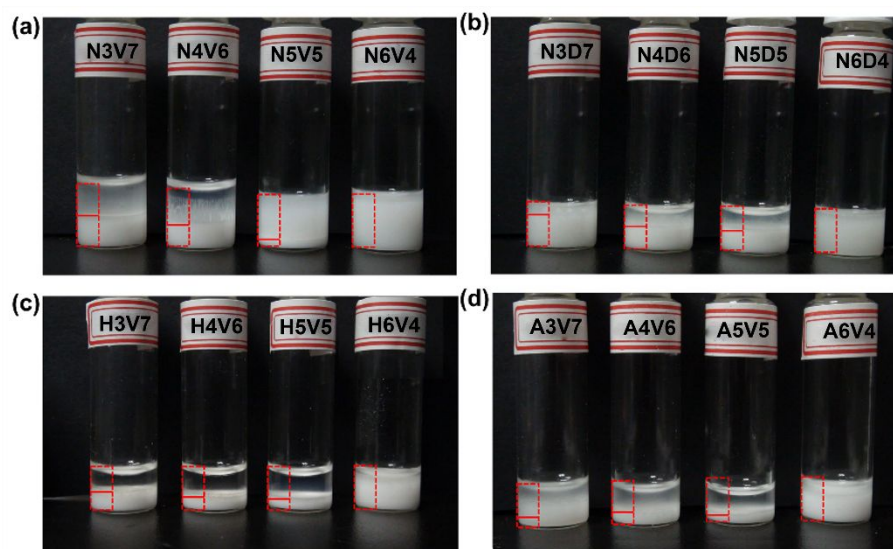

Figure S2. Images of the precipitation layer formed from copolymerization systems of (a) NIPAM/VBIPS, (b) NIPAM/DVBAPS, (c) HEAA/VBIPS, and (d) AAm/VBIPS with different monomer ratios. The systems have the same recipes with those of bilayer hydrogels but without crosslinking agent.

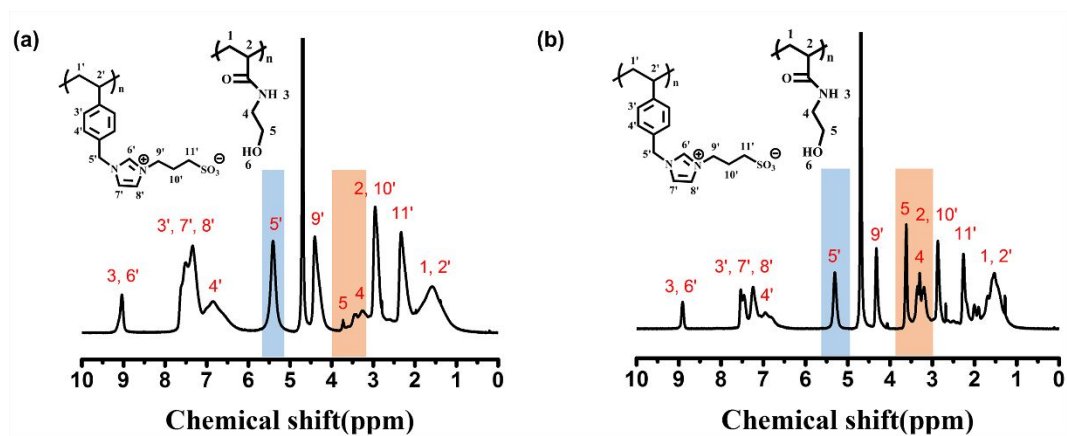

FigureS3.  $^1\text{H}$ -NMR spectra of copolymers formed in first step from HEAA:VBIPS= (a) 3:7 and (b) 6:4.

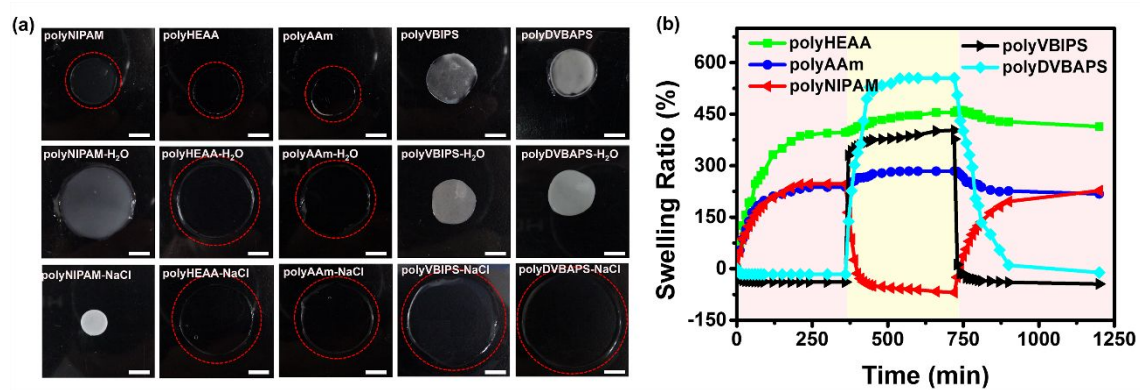

Figure S4. (a) Images and (b) swelling/deswelling curves of pristine polyNIPAM, polyHEAA, polyAAM, polyVBIPS and polyDVBAPS hydrogels.

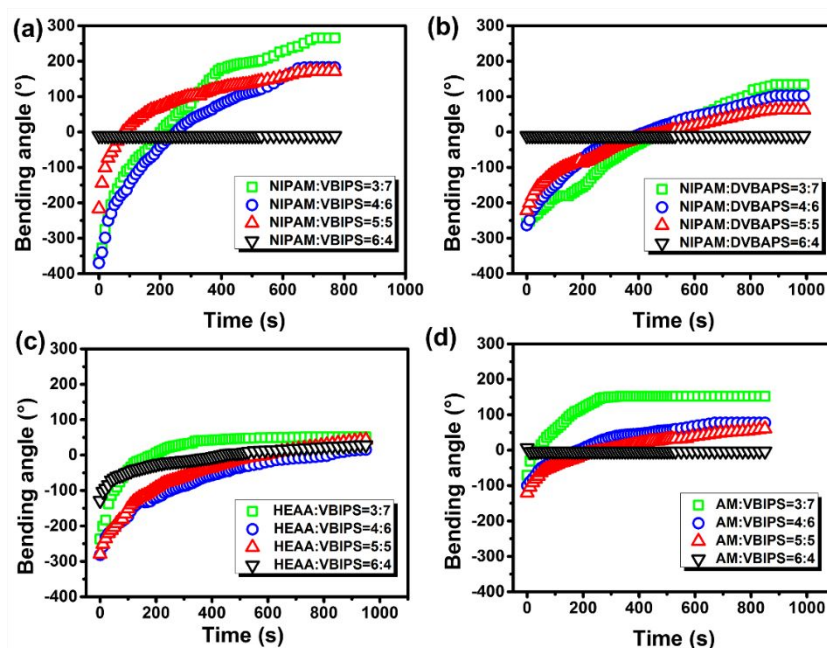

Figure S5. Bending kinetics of (a) polyNIPAM/polyVBIPS, (b) polyNIPAM/polyDVBAPS, (c) polyHEAA/polyVBIPS and (d) polyAAM/polyVBIPS bilayer hydrogels, prepared at different monomer ratios, in response to the environmental changes from water to 1.0 M NaCl solution.

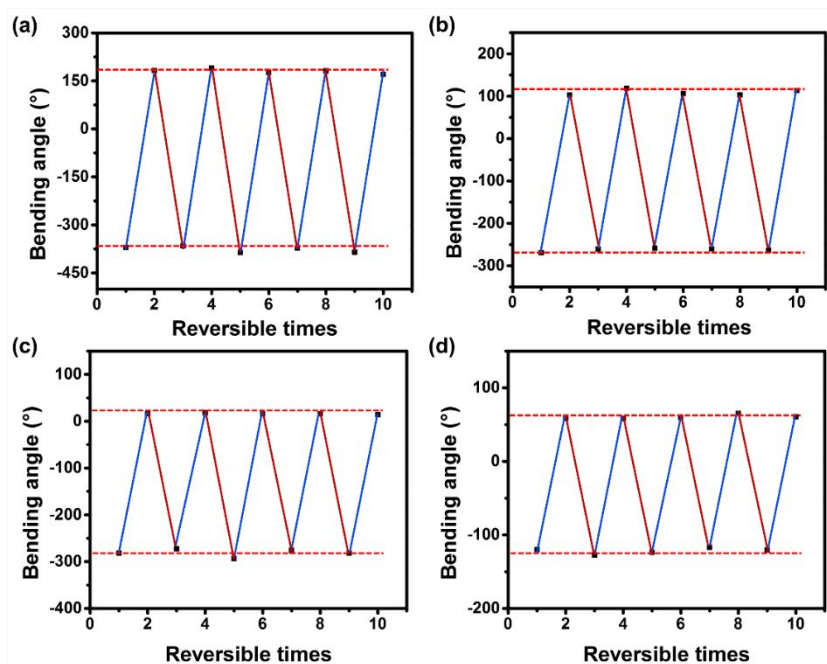

Figure S6. Reversible bending of (a) polyNIPAM/polyVBIPS (N4V6), (b) polyNIPAM/polyDVBAPS (N4D6), (c) polyHEAA/polyVBIPS (H4V6) and (d) polyAAM/polyVBIPS (A5V5) bilayer hydrogels with 1.0 mm thickness with the environments switched between in water and in 1.0 M NaCl solutions.
